# Supplementary material for: A continuous 6000 year age depth relationship for the remainder of the Weißseespitze summit glacier based on 39 Ar and 14 C dating
Source: Copernicus journal article supplement (doi:10.5194/egusphere-2025-3681), 2025-08-11
Supplement: Supplementary file 1 [file egusphere-2025-3681-supplement.pdf]

## Supplementary Information

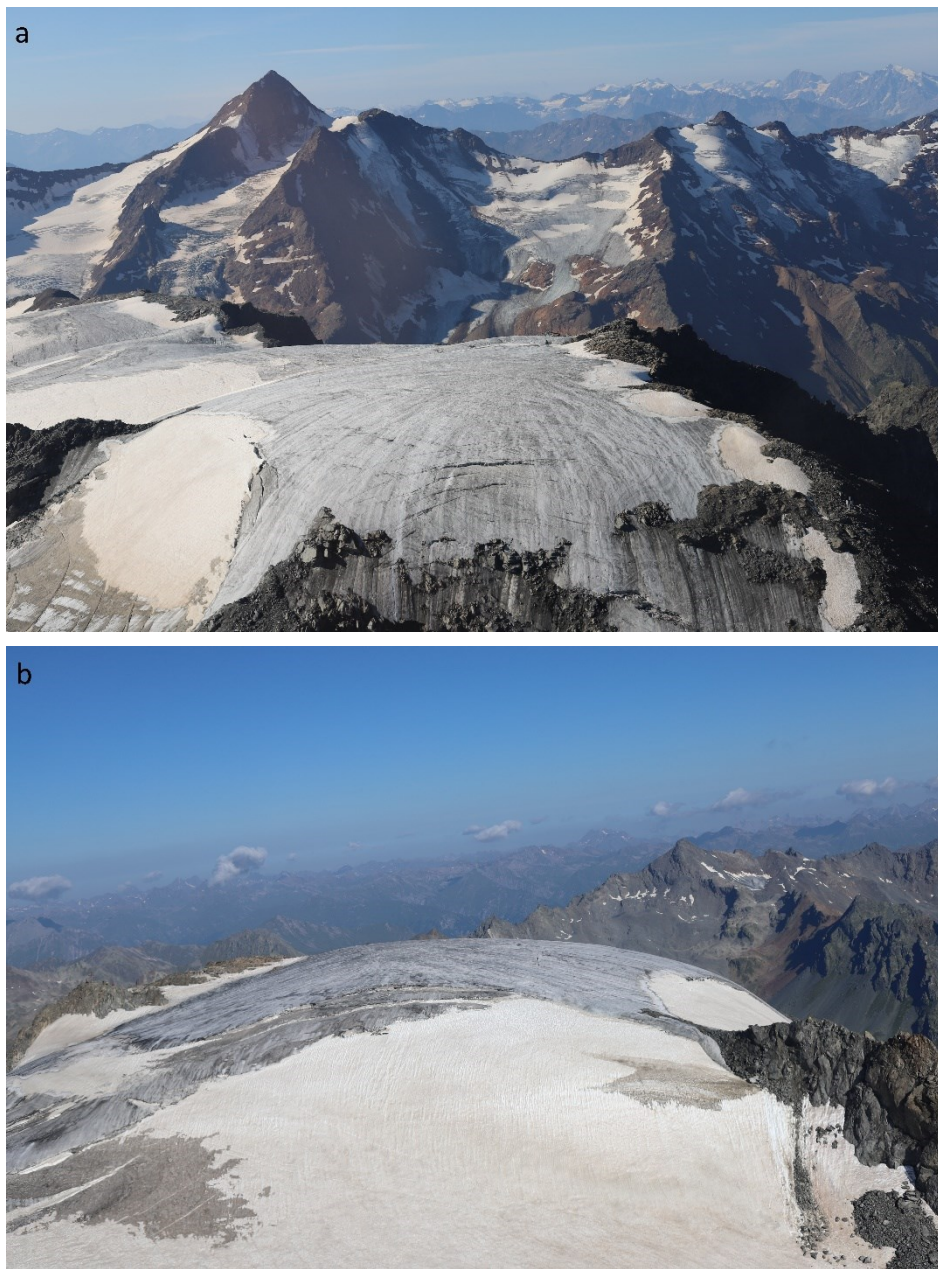

5 Figure S1: Aerial photos taken from the WSS summit region from August 2024. (a) from NE (b) from SE

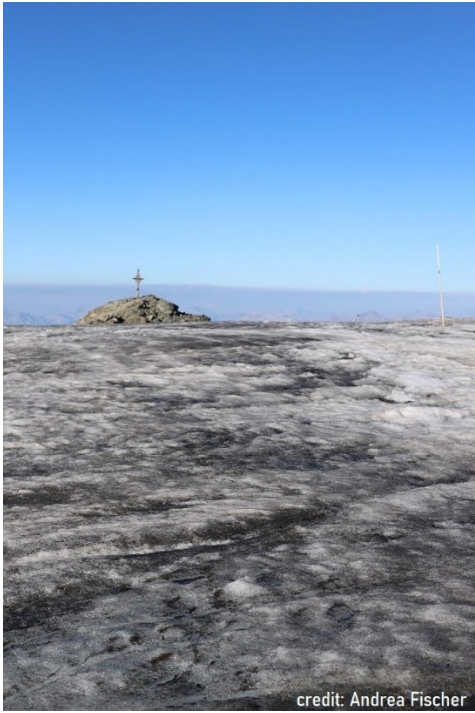

**Figure S2:** Photo of the summit region of the WSS summit glacier. The uniformly appearing dust layer due to ablation indicates the homogeneous common depth horizon across the summit region. Photo taken by A. Fischer.

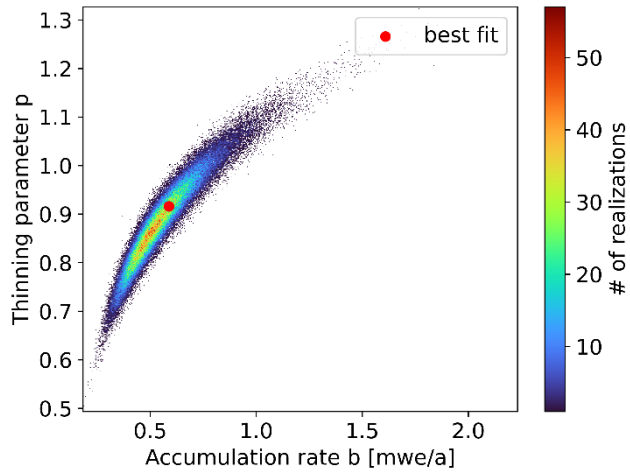

10 **Figure S3:** Parameter distribution of the  $10^5$  MC realizations of the 2p model. The best fit was obtained by fitting the measured values, while all other realizations stem from MC sampling from the age distributions and the variation of the LSS parameters.
